# Supplementary material for: NiO nanosheets as efficient top hole transporters for carbon counter electrode based perovskite solar cells
Source: Royal Society of Chemistry journal article supplement (doi:10.1039/c5ta06458a), 2015-01-01
Supplement: c5ta06458a1.pdf [file c5ta06458a1.pdf]

## Supporting Information

NiO nanosheets as efficient hole transporter for carbon counter electrode  
based perovskite solar cells

Zonghao Liu,<sup>‡ a</sup> Meng Zhang,<sup>‡ a</sup> Xiaobao Xu,<sup>a</sup> Fensha Cai,<sup>a</sup> Huailiang Yuan,<sup>a</sup>  
Lingling Bu,<sup>a</sup> Wenhui Li,<sup>a</sup> Aili Zhu,<sup>a</sup> Zhixin Zhao,<sup>\*a</sup> Mingkui Wang,<sup>\*a</sup> Yi-Bing  
Cheng,<sup>ac</sup> Hongshan He<sup>\*b</sup>

<sup>a</sup> Michael Grätzel Center for Mesoscopic Solar Cells, Wuhan National Laboratory for  
Optoelectronics, School of Optical and Electronic Information, Huazhong University  
of Science and Technology, Wuhan, Hubei 430074, PR China.

<sup>b</sup> Department of Chemistry, Eastern Illinois University, Charleston, Illinois 61920,  
United States

<sup>c</sup> Department of Materials Engineering, Monash University, Melbourne, Victoria  
3800, Australia

\*E-mail: [zhixin-zhao@hust.edu.cn](mailto:zhixin-zhao@hust.edu.cn);

\*E-mail: [mingkui.wang@mail.hust.edu.cn](mailto:mingkui.wang@mail.hust.edu.cn);

\*E-mail: [hhe@eiu.edu](mailto:hhe@eiu.edu).

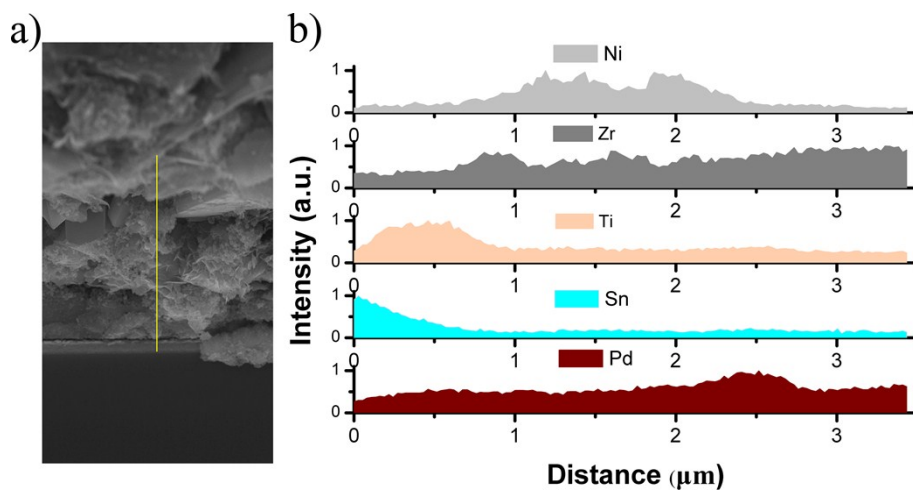

Fig. S1 a) Cross-sectional scanning electron micrograph (SEM) of NiO nanosheets based device and b) Distribution of components Ni, Zr, Ti, Pb and Sn, in NiO nanosheets based device obtained by line scan analysis of energy-dispersive x-ray (EDX) spectroscopy.

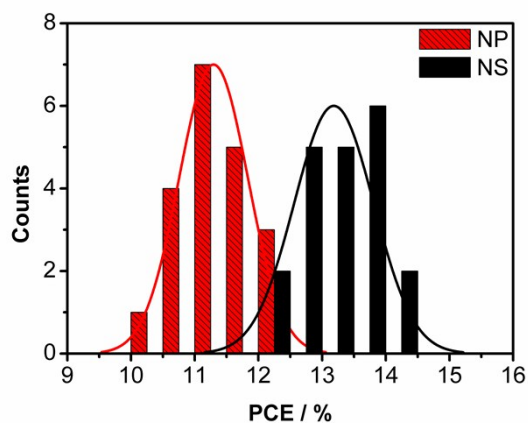

Fig. S2 Histogram of power conversion efficiency (PCE) for 20 pieces of NiO nanoparticles (NP, red) based devices and NiO nanosheets (NS, black) based devices.

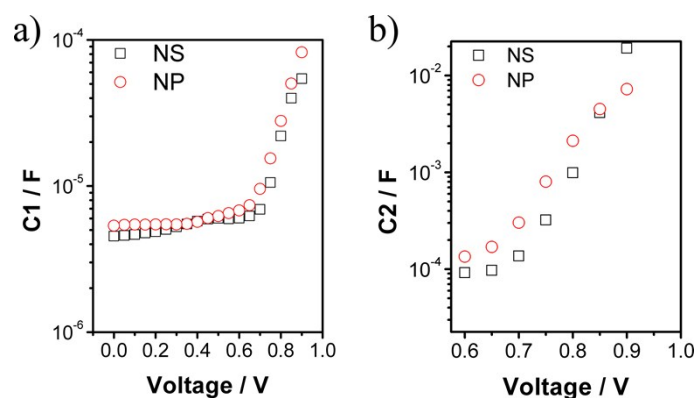

Fig. S3 Plot of capacitance C1 for the NiO/perovskite interface and C2 for the ionic motion in perovskite of NiO nanosheets device (NS, black square) and NiO nanoparticle device (NP, red circle) obtained from impedance measurements under illumination at given bias.

Tale S1. BET results for NiO nanosheets and NiO nanoparticles powder.

|                   | Surface area ( $\text{m}^2 \text{g}^{-1}$ )<br>powder |
|-------------------|-------------------------------------------------------|
| NiO nanosheets    | 56.20                                                 |
| NiO nanoparticles | 77.89                                                 |

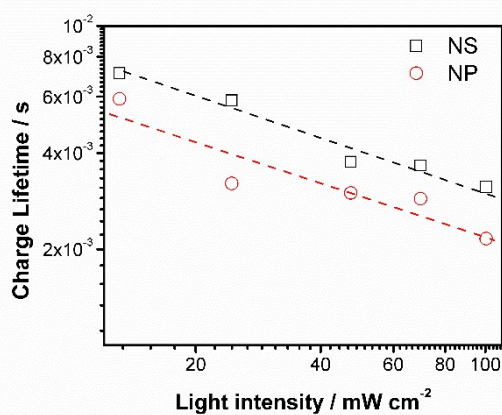

Fig. S4 Charge lifetime versus light intensity from transient photovoltage decay measurements of NiO-NS device (NS, black square) and NiO-NP device (NP, red circle).

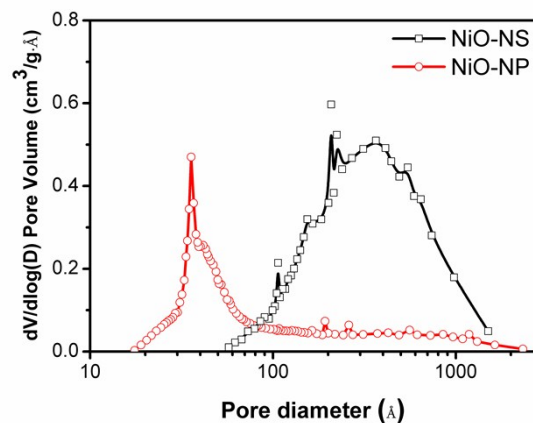

Fig. S5 Pore-size distribution of NiO nanosheets (NiO-NS) powder and NiO particles (NiO-NP) powder from BET measurements.

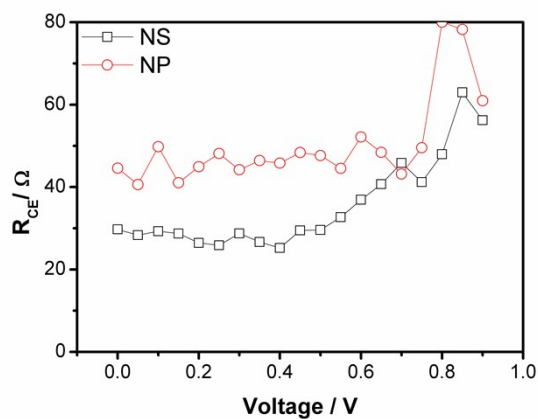

Fig. S6 Plot of  $R_{CE}$  for the NiO nanosheets device (NS, black square) and NiO nanoparticle device (NP, red circle) obtained from impedance measurements under illumination at given bias.
